# Supplementary material
Source: publisher figshare collection journal article supplement (https://frontiersin.figshare.com/ndownloader/files/25506836)
Supplement: Supplementary file 1 [file 25506836]

Supplementary material - Appendices

Do citizens perceive elected politicians, experts and citizens as alternative or complementary policy-makers? A study of Belgian citizens.

**Appendix 1. Sociodemographic characteristics of Survey Respondents in Comparison to Population total in Belgium**

|  | Flanders |  | Wallonia |  | Brussels |  |
| --- | --- | --- | --- | --- | --- | --- |
|  | EOS | Pop. | EOS | Pop. | EOS | Pop. |
| Men | 58.1% | 49.5% | 48.6% | 48.8% | 54.8% | 48.9% |
| Women | 41.9% | 50.5% | 51.4% | 51.2% | 45.2% | 51.1% |
| Max. Primary education | 12.3% | 27.0% | 12.4% | 33.1% | 10.0% | 24.3% |
| Max. High School Education | 40.0% | 41.6% | 36.7% | 39.5% | 26.4% | 36.5% |
| Universitary Education | 47.6% | 31.4% | 50.9% | 27,40% | 63.6% | 39.2% |
| Age 18 to 29 | 11.6% | 17.7% | 14.6% | 19.3% | 17.0% | 23.5% |
| Age 39 to 44 | 20.6% | 24.2% | 29.0% | 24.7% | 23.2% | 33.0% |
| Age 45 to 64 | 40.5% | 34.5% | 46.9% | 34.2% | 38.6% | 31.2% |
| Age 65+ | 27.4% | 23.6% | 9.7% | 21.8% | 21.2% | 12.3% |
| Note: The entries do not reach the total of 100% since totals were rounded | | | | | | |

**Appendix 2. Descriptive statistics regarding support for institutional reforms in Belgium**

|  | N | Mean | Standard deviation |
| --- | --- | --- | --- |
| In general, are you for or against consultative referendums about important national issues? Citizens have the right to vote for or against a specific proposition. The parliament receives the voters’ opinion but is not obliged to follow it. [0-10 scale: Strongly against; 10 = Strongly in favour; 99 = I do not know] | 6723 | 7.00 | 2.44 |
| In general, are you for or against binding referendums about important national issues? Citizens have the right to vote for or against a specific proposition. The parliament receives the voters’ opinion and is obliged to follow it. [0-10 scale: 0 = Strongly against; 10 = Strongly in favour; 99 = I do not know] | 6708 | 6.75 | 2.63 |
| In general, are you for or against the organisation of consultative citizen forums on important national issues? A citizen forum is an assembly composed of around 30 to 50 citizens, selected at random, who meet and discuss a certain topic in order to formulate a recommendation that is then transmitted to the parliament. [0-10 scale: 0 = Strongly against; 10 = Strongly in favour; 99 = I do not know] | 6630 | 6.91 | 2.34 |
| Experts should take the major political decisions instead of politicians [1 = Totally against; 2 = Somewhat against; 3 = Somewhat in favour; 4 = Totally in favour; 99 = I do not know/no opinion] | 5741 | 2.82 | .83 |

Note: Don’t know/no opinion were treated as missing values.

**Appendix 3. Key socio-demographic and political variables for survey respondents**

| ***Age*** | | | | | | |
| --- | --- | --- | --- | --- | --- | --- |
|  | Total | | | In % | | |
| 18-24 | 731 | | | 9.61 | | |
| 25-34 | 1125 | | | 14.79 | | |
| 35-44 | 1242 | | | 16.32 | | |
| 45-54 | 144 | | | 18.92 | | |
| 55-64 | 1378 | | | 18.11 | | |
| 65+ | 1693 | | | 22.25 | | |
| ***Highest level of education of respondents*** | | | | | | |
|  | | | Frequency | | | In % |
| Primary education/ Secondary education incomplete | | | 968 | | | 12.72 |
| Secondary education complete | | | 2825 | | | 37.13 |
| Higher non-universitary or universitary education | | | 3816 | | | 50.15 |
| ***Working Status**** | | | | | | |
|  | | | Frequency | | | In % |
| Student unremunerated training | | | 554 | | | 7.28 |
| Preretired | | | 140 | | | 1.84 |
| Retired | | | 1972 | | | 25.92 |
| Houseman or housewife | | | 243 | | | 3.19 |
| Unemployed or jobseeker | | | 413 | | | 5.43 |
| Permanent incapacity to work | | | 454 | | | 5.97 |
| Liberal profession | | | 128 | | | 1.68 |
| Merchant artisan or other independent professions | | | 168 | | | 2.21 |
| Unskilled worker (Bluecollars) | | | 198 | | | 2.60 |
| Skilled worker | | | 373 | | | 4.90 |
| Employee | | | 2361 | | | 31.03 |
| Executive | | | 432 | | | 5.68 |
| Other | | | 173 | | | 2.27 |
| ***Gender*** | | | | | | |
|  | | | Frequency | | | In % |
| Man | | | 3928 | | | 51.70 |
| Woman | | | 3670 | | | 48.30 |
| ***Respondents' main residence by Region*** | | | | | | |
|  | | | Frequency | | | In % |
| Region of Brussels Capital | | | 1056 | | | 13.88 |
| Flemish region | | | 342 | | | 44.95 |
| Walloon region | | | 3133 | | | 41.17 |
|  | | |  | | |  |
| ***Respondents' satisfaction with household income*** | | | | | | |
|  | | | Freq. | | | In % |
| Very unsatisfied | | | 271 | | | 3.60 |
| 1 | | | 140 | | | 1.86 |
| 2 | | | 252 | | | 3.35 |
| 3 | | | 375 | | | 4.99 |
| 4 | | | 404 | | | 5.37 |
| 5 | | | 885 | | | 11.77 |
| 6 | | | 1236 | | | 16.44 |
| 7 | | | 1874 | | | 24.92 |
| 8 | | | 1469 | | | 19.54 |
| 9 | | | 396 | | | 5.27 |
| Very satisfied | | | 217 | | | 2.89 |
| ***Level of Political Knowledge*** | | | | | | |
|  | | | Frequency | | | In % |
| No political knowledge | | | 956 | | | 12.55 |
| 1 | | | 920 | | | 12.08 |
| 2 | | | 1047 | | | 13.75 |
| 3 | | | 1125 | | | 14.77 |
| 4 | | | 1284 | | | 16.86 |
| 5 | | | 1321 | | | 17.34 |
| Very high | | | 964 | | | 12.66 |
| ***Extent to which respondent is interested in politics*** | | | | | | |
|  | | | Frequency | | | In % |
| Not interested at all | | | 658 | | | 8.68 |
| 1 | | | 354 | | | 4.67 |
| 2 | | | 491 | | | 6.47 |
| 3 | | | 462 | | | 6.09 |
| 4 | | | 355 | | | 4.68 |
| 5 | | | 1038 | | | 13.69 |
| 6 | | | 890 | | | 11.74 |
| 7 | | | 1228 | | | 16.19 |
| 8 | | | 1059 | | | 13.96 |
| 9 | | | 592 | | | 7.81 |
| Extremely interested | | | 457 | | | 6.03 |
| ***Respondents' political convictions from left to right*** | | | | | | |
|  | | | Frequency | | | In % |
| Left | | | 269 | | | 3.55 |
| 1 | | | 255 | | | 3.37 |
| 2 | | | 486 | | | 6.41 |
| 3 | | | 528 | | | 6.97 |
| 4 | | | 550 | | | 7.26 |
| In the center | | | 2473 | | | 32.64 |
| 6 | | | 672 | | | 8.87 |
| 7 | | | 933 | | | 12.32 |
| 8 | | | 825 | | | 10.89 |
| 9 | | | 319 | | | 4.21 |
| Right | | | 266 | | | 3.51 |
| ***Respondents' level of trust in politicians*** | | | | | | |
|  | | Frequency | | | In % | |
| Absolutely no trust | | 1379 | | | 18.46 | |
| 1 | | 649 | | | 8.69 | |
| 2 | | 774 | | | 10.36 | |
| 3 | | 841 | | | 11.26 | |
| 4 | | 816 | | | 10.92 | |
| 5 | | 1456 | | | 19.49 | |
| 6 | | 792 | | | 10.60 | |
| 7 | | 486 | | | 6.50 | |
| 8 | | 181 | | | 2.42 | |
| 9 | | 57 | | | 0.76 | |
| Complete trust | | 41 | | | 0.55 | |
| ***Respondent's level of trust in political parties*** | | | | | | |
|  | | Frequency | | | In % | |
| Absolutely no trust | | 1,322 | | | 17.69 | |
| 1 | | 633 | | | 8.47 | |
| 2 | | 808 | | | 10.81 | |
| 3 | | 849 | | | 11.36 | |
| 4 | | 841 | | | 11.26 | |
| 5 | | 1,514 | | | 20.26 | |
| 6 | | 752 | | | 10.06 | |
| 7 | | 485 | | | 6.49 | |
| 8 | | 169 | | | 2.26 | |
| 9 | | 63 | | | 0.84 | |
| Complete trust | | 36 | | | 0.48 | |
| ***Respondent's level of trust in the National Parliament*** | | | | | | |
|  | | Frequency | | | In % | |
| Absolutely no trust | | 1132 | | | 15.15 | |
| 1 | | 465 | | | 6.22 | |
| 2 | | 626 | | | 8.38 | |
| 3 | | 754 | | | 10.09 | |
| 4 | | 759 | | | 10.16 | |
| 5 | | 1661 | | | 22.23 | |
| 6 | | 977 | | | 13.08 | |
| 7 | | 694 | | | 9.29 | |
| 8 | | 277 | | | 3.71 | |
| 9 | | 79 | | | 1.06 | |
| Complete trust | | 48 | | | 0.64 | |
| ***Respondents' level of trust in the EU*** | | | | | | |
|  | | Frequency | | | In % | |
| Absolutely no trust | | 12 | | | 16.06 | |
| 1 | | 468 | | | 6.26 | |
| 2 | | 542 | | | 7.25 | |
| 3 | | 702 | | | 9.40 | |
| 4 | | 675 | | | 9.03 | |
| 5 | | 1573 | | | 21.05 | |
| 6 | | 978 | | | 13.09 | |
| 7 | | 752 | | | 10.06 | |
| 8 | | 407 | | | 5.45 | |
| 9 | | 114 | | | 1.53 | |
| Complete trust | | 61 | | | 0.82 | |

**Appendix 4 – Box plots of the mean positions of each latent profile on the nine items reporting respondents’ evaluations of politicians, experts and citizens**

**See figure in separate file**

**Appendix 5 - Linear and multinomial regressions regarding support for institutional reforms by latent profile**

| **Dependent variable** | **Consultative referendum** | **Binding referendum** | **Citizen Forum** |
| --- | --- | --- | --- |
| R2 | 0.061 | 0.136 | 0.110 |
| Sceptical | -1.435*** | -2.100*** | -1.818*** |
|  | (0.26) | (0.28) | (0.26) |
|  |  |  |  |
| Apathetic | -0.365** | -0.314* | -0.453*** |
|  | (0.12) | (0.12) | (0.11) |
|  |  |  |  |
| Delegative | -0.214 | -1.257*** | -0.420** |
|  | (0.16) | (0.18) | (0.15) |
|  |  |  |  |
| Participatory | -0.178 | 0.953*** | 0.650*** |
|  | (0.25) | (0.18) | (0.19) |
|  |  |  |  |
| Hybrid | 0.646*** | 0.922*** | 0.894*** |
|  | (0.07) | (0.07) | (0.06) |
|  |  |  |  |
| Non-Represent | 1.445*** | 2.143*** | 1.888*** |
|  | (0.14) | (0.12) | (0.12) |
|  |  |  |  |
| agegroups | -0.009 | 0.024 | -0.041* |
|  | (0.02) | (0.02) | (0.02) |
|  |  |  |  |
| Edu_Lowtoh~h | 0.083 | -0.201*** | 0.034 |
|  | (0.05) | (0.05) | (0.04) |
|  |  |  |  |
| Gender1Women | 0.225*** | 0.137* | 0.203*** |
|  | (0.06) | (0.06) | (0.06) |
|  |  |  |  |
| EMPL_BLUEC~R | -0.232 | 0.017 | -0.249 |
|  | (0.17) | (0.17) | (0.18) |
|  |  |  |  |
| EMPL_Unemp~d | -0.098 | -0.057 | -0.014 |
|  | (0.14) | (0.14) | (0.12) |
|  |  |  |  |
| Sat_Inc | -0.009 | -0.059*** | -0.038* |
|  | (0.02) | (0.02) | (0.02) |
|  |  |  |  |
| Region_Bru~s | 0.166 | 0.288** | 0.553*** |
|  | (0.09) | (0.09) | (0.08) |
|  |  |  |  |
| Region_Wal | 0.349*** | 0.463*** | 0.669*** |
|  | (0.06) | (0.07) | (0.06) |
|  |  |  |  |
| PolInt | 0.069*** | 0.024 | 0.059*** |
|  | (0.01) | (0.01) | (0.01) |
|  |  |  |  |
| Left_Right | 0.030* | 0.047*** | -0.047*** |
|  | (0.01) | (0.01) | (0.01) |
|  |  |  |  |
| Pol_Knowl_~e | 0.087*** | -0.044* | 0.015 |
|  | (0.02) | (0.02) | (0.02) |
|  |  |  |  |
| TrustPCA | -0.069** | -0.296*** | -0.128*** |
|  | (0.02) | (0.02) | (0.02) |
|  |  |  |  |
| _cons | 5.626*** | 6.742*** | 6.397*** |
|  | (0.20) | (0.20) | (0.19) |
| N | 6635 | 6621 | 6552 |

| **Support for Expert (Dependent variables)** | **Totally_against** | **Somewhat against** | **Totally in Favour** |
| --- | --- | --- | --- |
| Sceptical | 27.468*** | 3.764*** | 1.727* |
|  | (6.89) | (0.90) | (0.46) |
| Apathetic | 3.986*** | 1.745*** | 1.153 |
|  | (0.67) | (0.20) | (0.17) |
| Delegative | 0.491* | 0.509*** | 1.833*** |
|  | (0.16) | (0.08) | (0.29) |
| Participatory | 16.237*** | 2.552*** | 2.644*** |
|  | (4.14) | (0.62) | (0.61) |
| Hybrid | 0.531*** | 0.547*** | 1.753*** |
|  | (0.08) | (0.05) | (0.16) |
| Non-representative | 0.270* | 0.144*** | 7.419*** |
|  | (0.14) | (0.05) | (1.09) |
| Age groups | 1.191*** | 1.094*** | 1.013 |
|  | (0.05) | (0.02) | (0.02) |
| Edu_Lowtoh~h | 0.909 | 0.979 | 0.929 |
|  | (0.08) | (0.05) | (0.05) |
| Gender1Women | 0.598*** | 0.914 | 0.961 |
|  | (0.08) | (0.07) | (0.08) |
| EMPL_BLUEC~R | 1.005 | 1.039 | 0.680 |
|  | (0.43) | (0.26) | (0.18) |
| EMPL_Unemp~d | 1.167 | 1.134 | 0.664* |
|  | (0.30) | (0.19) | (0.12) |
| Sat_Inc | 1.013 | 1.044* | 0.978 |
|  | (0.03) | (0.02) | (0.02) |
| Region_Bru~s | 1.134 | 1.124 | 0.991 |
|  | (0.19) | (0.12) | (0.11) |
| Region_Wal | 1.102 | 1.102 | 0.865 |
|  | (0.14) | (0.08) | (0.07) |
| PolInt | 1.115*** | 1.072*** | 1.003 |
|  | (0.03) | (0.02) | (0.02) |
| Left_Right | 0.918*** | 0.980 | 1.035* |
|  | (0.02) | (0.01) | (0.02) |
| Pol_Knowl_~e | 1.096* | 1.098*** | 0.901*** |
|  | (0.04) | (0.03) | (0.02) |
| TrustPCA | 1.230*** | 1.196*** | 0.779*** |
|  | (0.05) | (0.03) | (0.02) |
| _cons | 0.039*** | 0.153*** | 0.416*** |
|  | (0.01) | (0.04) | (0.10) |
|  |  |  |  |
| McFadden's Adj R2: | 0.084 | Cragg & Uhler's R2: | 0.225 |
| N | 5676 | * = 5% ** =1% *** = 1‰ | |
